# Supplementary material for: Thermal Detection of Glucose in Urine Using a Molecularly Imprinted Polymer as a Recognition Element
Source: PubMed Central journal article supplement — ACS Sens. 2021 Nov 26;6(12):4515–25. doi: 10.1021/acssensors.1c02223 (PMC8715537; doi:10.1021/acssensors.1c02223), 2021-11-26
Supplement: se1c02223_si_001.pdf [file se1c02223_si_001.pdf]

# Thermal Detection of Glucose in Urine using a Molecularly Imprinted Polymer as Recognition Element.

## Supplementary information

Manlio Caldara<sup>1\*</sup>, Joseph W. Lowdon<sup>1</sup>, Renato Rogosic<sup>1</sup>, Rocio Arreguin-Campos<sup>1</sup>, Kathia L. Jimenez-Monroy<sup>1</sup>, Benjamin Heidt<sup>1</sup>, Kristina Tschulik<sup>2</sup>, Thomas J. Cleij<sup>1</sup>, Hanne Diliën<sup>1</sup>, Kasper Eersels<sup>1</sup> and Bart van Grinsven<sup>1</sup>

1. Sensor Engineering Department, Faculty of Science and Engineering, Maastricht University, P.O. Box 616, 6200 MD Maastricht, the Netherlands
2. Faculty of Chemistry and Biochemistry, Analytical Chemistry II, Ruhr University Bochum, Universitätsstr. 150, ZEMOS, 44801 Bochum, Germany

\* Corresponding author: [m.caldara@maastrichtuniversity.nl](mailto:m.caldara@maastrichtuniversity.nl)

### Supplementary: Figures

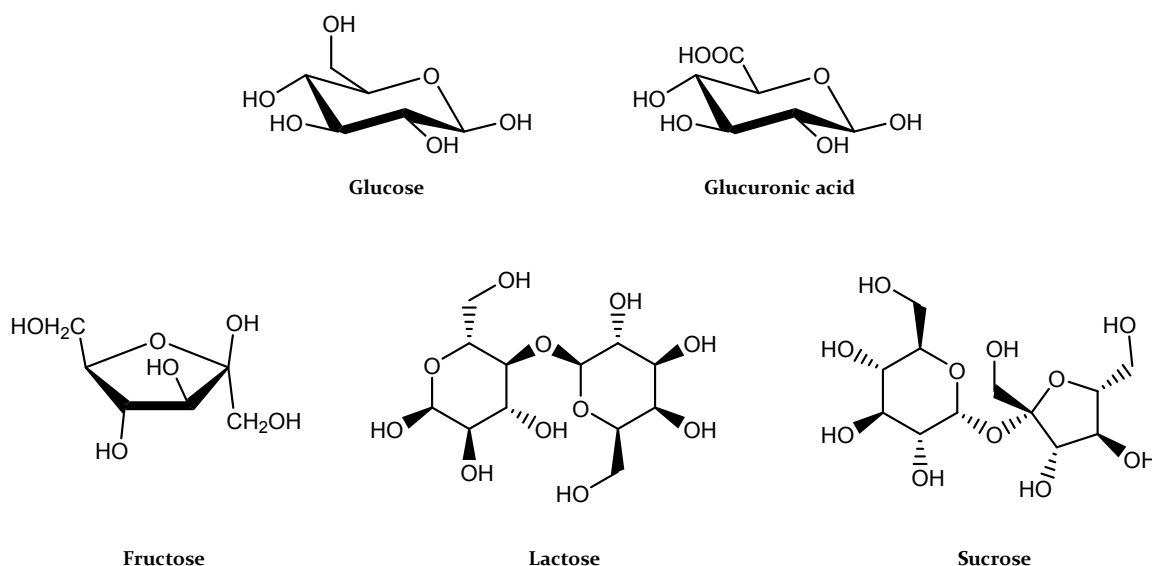

**Figure S1.** Chemical structures of Glucose, Glucuronic acid, Fructose, Lactose and Sucrose.

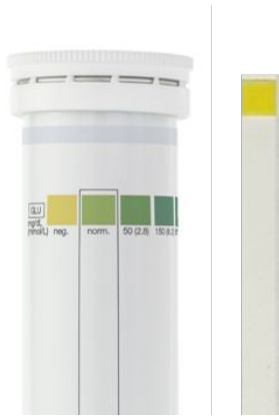

**Figure S2.** Test strips for detection of glucose in urine show no presence of glucose in the collected urine samples.
